# Supplementary material
Source: publisher figshare collection journal article supplement (https://tandf.figshare.com/articles/dataset/_/3084343)
Supplement: Supplementary file 1 [file 1]

112 **Table S2. Species of invertebrates consumed by Barn Owls in Europe.**

| Class      | Order             | Family         | Genus              | Species           | Total number identified |
|------------|-------------------|----------------|--------------------|-------------------|-------------------------|
| Arachnida  | Aranea            | Dysderidae     | sp.                |                   | 1                       |
| Arachnida  | Aranea            | Lycosidae      | sp.                |                   | 1                       |
| Arachnida  | Araneae           | Araneoidea     | sp.                |                   | 3                       |
| Arachnida  | Scorpiones        | Buthidae       | <i>Buthus</i>      | <i>occitanus</i>  | 1                       |
| Arachnida  | Scorpiones        | sp.            |                    |                   | 1                       |
| Arachnida  | sp.               |                |                    |                   | 18                      |
| Bivalvia   | sp.               |                |                    |                   | 1                       |
| Chilopoda  | Scolopendromorpha | Scolopendridae | sp.                |                   | 1                       |
| Chilopoda  | sp.               |                |                    |                   | 4                       |
| Citellata  | Haplotaxida       | Lumbricidae    | <i>Lumbricus</i>   | sp.               | 7                       |
| Gastropoda | Basommatophora    | Planorbidae    | <i>Planorbis</i>   | <i>planorbis</i>  | 1                       |
| Gastropoda | Pulmonata         | sp.            |                    |                   | 1                       |
| Gastropoda | Stylommatophora   | Helicidae      | <i>Helix</i>       | sp.               | 1                       |
| Gastropoda | Stylommatophora   | Limacidae      | <i>Limax</i>       | sp.               | 2                       |
| Gastropoda | Stylommatophora   | Limacidae      | sp.                |                   | 1                       |
| Gastropoda | sp.               |                |                    |                   | 5                       |
| Insecta    | Blattodea         | Blattidae      | <i>Periplaneta</i> | <i>americana</i>  | 4                       |
| Insecta    | Coleoptera        | Acrididae      | <i>Chorthippus</i> | <i>parallelus</i> | 8                       |
| Insecta    | Coleoptera        | Acrididae      | sp.                |                   | 1                       |
| Insecta    | Coleoptera        | Anobiidae      | <i>Ptinus</i>      | sp.               | 1                       |
| Insecta    | Coleoptera        | Aphodiidae     | <i>Aphodius</i>    | <i>fimetarius</i> | 13                      |
| Insecta    | Coleoptera        | Aphodiidae     | <i>Aphodius</i>    | sp.               | 29                      |
| Insecta    | Coleoptera        | Carabidae      | <i>Bembidion</i>   | sp.               | 9                       |
| Insecta    | Coleoptera        | Carabidae      | <i>Broscus</i>     | <i>cephalotes</i> | 3                       |
| Insecta    | Coleoptera        | Carabidae      | <i>Calathus</i>    | sp.               | 6                       |
| Insecta    | Coleoptera        | Carabidae      | <i>Carabus</i>     | <i>coriaceus</i>  | 1                       |
| Insecta    | Coleoptera        | Carabidae      | <i>Carabus</i>     | <i>auratus</i>    | 14                      |
| Insecta    | Coleoptera        | Carabidae      | <i>Carabus</i>     | <i>granulatus</i> | 2                       |
| Insecta    | Coleoptera        | Carabidae      | <i>Carabus</i>     | <i>monilis</i>    | 2                       |
| Insecta    | Coleoptera        | Carabidae      | <i>Carabus</i>     | <i>nemoralis</i>  | 2                       |
| Insecta    | Coleoptera        | Carabidae      | <i>Carabus</i>     | sp.               | 9                       |
| Insecta    | Coleoptera        | Carabidae      | <i>Carabus</i>     | <i>sylvestris</i> | 4                       |
| Insecta    | Coleoptera        | Carabidae      | <i>Carabus</i>     | <i>violaceus</i>  | 1                       |
| Insecta    | Coleoptera        | Carabidae      | <i>Dolichus</i>    | <i>halensis</i>   | 1                       |
| Insecta    | Coleoptera        | Carabidae      | <i>Harpalus</i>    | <i>affinis</i>    | 2                       |
| Insecta    | Coleoptera        | Carabidae      | <i>Harpalus</i>    | <i>dimidiatus</i> | 1                       |
| Insecta    | Coleoptera        | Carabidae      | <i>Harpalus</i>    | sp.               | 67                      |
| Insecta    | Coleoptera        | Carabidae      | <i>Leistus</i>     | sp.               | 1                       |
| Insecta    | Coleoptera        | Carabidae      | <i>Nebria</i>      | sp.               | 2                       |
| Insecta    | Coleoptera        | Carabidae      | <i>Ophonus</i>     | <i>pubescens</i>  | 1                       |
| Insecta    | Coleoptera        | Carabidae      | <i>Ophonus</i>     | sp.               | 60                      |

|         |            |               |                      |                               |     |
|---------|------------|---------------|----------------------|-------------------------------|-----|
| Insecta | Coleoptera | Carabidae     | <i>Pterostichus</i>  | <i>globosus</i>               | 1   |
| Insecta | Coleoptera | Carabidae     | <i>Pterostichus</i>  | <i>vulgaris</i>               | 3   |
| Insecta | Coleoptera | Carabidae     | <i>Pterostichus</i>  | sp.                           | 5   |
| Insecta | Coleoptera | Carabidae     | <i>Zabrus</i>        | sp.                           | 2   |
| Insecta | Coleoptera | Carabidae     | sp.                  |                               | 187 |
| Insecta | Coleoptera | Cerambycidae  | <i>Aegosoma</i>      | sp.                           | 1   |
| Insecta | Coleoptera | Cerambycidae  | <i>Ergates</i>       | <i>faber</i>                  | 4   |
| Insecta | Coleoptera | Cerambycidae  | <i>Rosalia</i>       | <i>alpina</i>                 | 20  |
| Insecta | Coleoptera | Cerambycidae  | sp.                  |                               | 15  |
| Insecta | Coleoptera | Cetoniidae    | <i>Cetonia</i>       | <i>aurata</i>                 | 1   |
| Insecta | Coleoptera | Cetoniidae    | <i>Cetonia</i>       | sp.                           | 1   |
| Insecta | Coleoptera | Chrysomelidae | <i>Altica</i>        | sp.                           | 1   |
| Insecta | Coleoptera | Chrysomelidae | <i>Cassida</i>       | sp.                           | 8   |
| Insecta | Coleoptera | Chrysomelidae | <i>Gonioctena</i>    | sp.                           | 1   |
| Insecta | Coleoptera | Chrysomelidae | <i>Leptinotarsa</i>  | <i>decemlineata</i>           | 2   |
| Insecta | Coleoptera | Chrysomelidae | <i>Lilioceris</i>    | <i>lilii</i>                  | 1   |
| Insecta | Coleoptera | Chrysomelidae | sp.                  |                               | 7   |
| Insecta | Coleoptera | Coccinellidae | <i>Adalia</i>        | <i>bipunctata</i>             | 3   |
| Insecta | Coleoptera | Coccinellidae | <i>Coccinella</i>    | <i>septempunctata</i>         | 12  |
| Insecta | Coleoptera | Coccinellidae | <i>Myzia</i>         | <i>oblongoguttata</i>         | 1   |
| Insecta | Coleoptera | Coccinellidae | <i>Subcoccinella</i> | <i>vigintiquatuorpunctata</i> | 2   |
| Insecta | Coleoptera | Curculionidae | <i>Otiorhynchus</i>  | <i>ligustici</i>              | 1   |
| Insecta | Coleoptera | Curculionidae | <i>Otiorhynchus</i>  | <i>ovatus</i>                 | 1   |
| Insecta | Coleoptera | Curculionidae | <i>Otiorhynchus</i>  | sp.                           | 3   |
| Insecta | Coleoptera | Curculionidae | sp.                  |                               | 123 |
| Insecta | Coleoptera | Dytiscidae    | <i>Dytiscus</i>      | <i>marginalis</i>             | 11  |
| Insecta | Coleoptera | Dytiscidae    | <i>Dytiscus</i>      | sp.                           | 1   |
| Insecta | Coleoptera | Dytiscidae    | sp.                  |                               | 6   |
| Insecta | Coleoptera | Elateridae    | <i>Agriotes</i>      | <i>lineatus</i>               | 1   |
| Insecta | Coleoptera | Elateridae    | <i>Agriotes</i>      | sp.                           | 2   |
| Insecta | Coleoptera | Elateridae    | <i>Melanotus</i>     | <i>communis</i>               | 1   |
| Insecta | Coleoptera | Elateridae    | sp.                  |                               | 15  |
| Insecta | Coleoptera | Geotrupidae   | <i>Ceratophyus</i>   | <i>hoffmannseggii</i>         | 25  |
| Insecta | Coleoptera | Geotrupidae   | <i>Geotrupes</i>     | sp.                           | 88  |
| Insecta | Coleoptera | Geotrupidae   | <i>Geotrupes</i>     | <i>stercorarius</i>           | 74  |
| Insecta | Coleoptera | Geotrupidae   | <i>Typhaeus</i>      | <i>typhoeus</i>               | 101 |
| Insecta | Coleoptera | Geotrupidae   | sp.                  |                               | 94  |
| Insecta | Coleoptera | Hydrophilidae | <i>Hydrophilus</i>   | <i>piceus</i>                 | 98  |
| Insecta | Coleoptera | Hydrophilidae | sp.                  |                               | 2   |
| Insecta | Coleoptera | Lucanidae     | <i>Lucanus</i>       | <i>cervus</i>                 | 11  |
| Insecta | Coleoptera | Lucanidae     | sp.                  |                               | 6   |
| Insecta | Coleoptera | Melolonthidae | <i>Polyphylla</i>    | <i>fullo</i>                  | 3   |
| Insecta | Coleoptera | Scarabaeidae  | <i>Amphimallon</i>   | <i>solstitialis</i>           | 14  |
| Insecta | Coleoptera | Scarabaeidae  | <i>Amphimallon</i>   | sp.                           | 59  |
| Insecta | Coleoptera | Scarabaeidae  | <i>Amphimallon</i>   | sp.                           | 28  |
| Insecta | Coleoptera | Scarabaeidae  | <i>Anomala</i>       | <i>dubia</i>                  | 1   |

|         |             |                |                     |                     |      |
|---------|-------------|----------------|---------------------|---------------------|------|
| Insecta | Coleoptera  | Scarabaeidae   | <i>Anoxia</i>       | sp.                 | 1    |
| Insecta | Coleoptera  | Scarabaeidae   | <i>Anoxia</i>       | <i>villosa</i>      | 1    |
| Insecta | Coleoptera  | Scarabaeidae   | <i>Bubas</i>        | <i>bison</i>        | 41   |
| Insecta | Coleoptera  | Scarabaeidae   | <i>Copris</i>       | <i>hispanus</i>     | 466  |
| Insecta | Coleoptera  | Scarabaeidae   | <i>Copris</i>       | <i>lunaris</i>      | 15   |
| Insecta | Coleoptera  | Scarabaeidae   | <i>Copris</i>       | sp.                 | 7    |
| Insecta | Coleoptera  | Scarabaeidae   | <i>Melolontha</i>   | <i>Melolontha</i>   | 226  |
| Insecta | Coleoptera  | Scarabaeidae   | <i>Melolontha</i>   | sp.                 | 154  |
| Insecta | Coleoptera  | Scarabaeidae   | <i>Oryctes</i>      | <i>nasicornis</i>   | 47   |
| Insecta | Coleoptera  | Scarabaeidae   | <i>Pentodon</i>     | <i>algerinus</i>    | 1    |
| Insecta | Coleoptera  | Scarabaeidae   | <i>Pentodon</i>     | <i>bidens</i>       | 2    |
| Insecta | Coleoptera  | Scarabaeidae   | <i>Phyllopertha</i> | <i>horticola</i>    | 1    |
| Insecta | Coleoptera  | Scarabaeidae   | <i>Rhizotrogus</i>  | <i>solstitialis</i> | 4    |
| Insecta | Coleoptera  | Scarabaeidae   | <i>Rhizotrogus</i>  | sp.                 | 3    |
| Insecta | Coleoptera  | Scarabaeidae   | <i>Scarabaeus</i>   | sp.                 | 1    |
| Insecta | Coleoptera  | Scarabaeidae   | sp.                 |                     | 163  |
| Insecta | Coleoptera  | Silphidae      | <i>Ablattaria</i>   | sp.                 | 1    |
| Insecta | Coleoptera  | Silphidae      | <i>Necrodes</i>     | <i>littoralis</i>   | 1    |
| Insecta | Coleoptera  | Silphidae      | <i>Nicrophorus</i>  | <i>humator</i>      | 2    |
| Insecta | Coleoptera  | Silphidae      | <i>Nicrophorus</i>  | sp.                 | 3    |
| Insecta | Coleoptera  | Silphidae      | <i>Silpha</i>       | <i>carinata</i>     | 2    |
| Insecta | Coleoptera  | Silphidae      | <i>Silpha</i>       | <i>obscura</i>      | 1    |
| Insecta | Coleoptera  | Staphylinidae  | sp.                 |                     | 31   |
| Insecta | Coleoptera  | Tenebrionidae  | <i>Blaps</i>        | <i>mucronata</i>    | 1    |
| Insecta | Coleoptera  | Tenebrionidae  | <i>Blaps</i>        | sp.                 | 1    |
| Insecta | Coleoptera  | Tenebrionidae  | <i>Opatrum</i>      | sp.                 | 1    |
| Insecta | Coleoptera  | Tenebrionidae  | <i>Tenebrio</i>     | <i>molitor</i>      | 114  |
| Insecta | Coleoptera  | Tenebrionidae  | sp.                 |                     | 15   |
| Insecta | Coleoptera  | sp.            |                     |                     | 1128 |
| Insecta | Dermaptera  | Anisolabididae | <i>Anisolabis</i>   | <i>maritima</i>     | 35   |
| Insecta | Dermaptera  | Forficulidae   | <i>Forficula</i>    | <i>auricularia</i>  | 43   |
| Insecta | Dermaptera  | Forficulidae   | sp.                 |                     | 15   |
| Insecta | Dermaptera  | sp.            |                     |                     | 8    |
| Insecta | Diptera     | Anthomyiidae   | sp.                 |                     | 1    |
| Insecta | Diptera     | Muscidae       | <i>Musca</i>        | <i>domestica</i>    | 7    |
| Insecta | Diptera     | Muscidae       | <i>Musca</i>        | sp.                 | 10   |
| Insecta | Diptera     | Muscidae       | sp.                 |                     | 1    |
| Insecta | Diptera     | Syrphidae      | sp.                 |                     | 1    |
| Insecta | Diptera     | Tipulidae      | sp.                 |                     | 2    |
| Insecta | Diptera     | sp.            |                     |                     | 3    |
| Insecta | Hemiptera   | Notonectidae   | <i>Notonecta</i>    | <i>glauca</i>       | 3    |
| Insecta | Hemiptera   | Pentatomidae   | <i>Aelia</i>        | <i>acuminata</i>    | 1    |
| Insecta | Hemiptera   | Pentatomidae   | <i>Rhaphigaster</i> | <i>nebulosa</i>     | 2    |
| Insecta | Hemiptera   | Pentatomidae   | sp.                 |                     | 1    |
| Insecta | Hemiptera   | sp.            |                     |                     | 36   |
| Insecta | Hymenoptera | Formicidae     | sp.                 |                     | 19   |

|              |             |                |                     |                     |      |
|--------------|-------------|----------------|---------------------|---------------------|------|
| Insecta      | Hymenoptera | Vespidae       | <i>Vespula</i>      | <i>germanica</i>    | 1    |
| Insecta      | Hymenoptera | Vespidae       | sp.                 |                     | 4    |
| Insecta      | Hymenoptera | sp.            |                     |                     | 8    |
| Insecta      | Lepidoptera | Nymphalidae    | <i>Aglais</i>       | <i>urticae</i>      | 2    |
| Insecta      | Lepidoptera | Nymphalidae    | sp.                 |                     | 1    |
| Insecta      | Lepidoptera | Pieridae       | <i>Pontia</i>       | sp.                 | 1    |
| Insecta      | Lepidoptera | sp.            |                     |                     | 18   |
| Insecta      | Mantodea    | Mantidae       | <i>Mantis</i>       | <i>religiosa</i>    | 5    |
| Insecta      | Mantodea    | Mantidae       | <i>Mantis</i>       | sp.                 | 2    |
| Insecta      | Mantodea    | Mantidae       | sp.                 |                     | 36   |
| Insecta      | Neuroptera  | Chrysopidae    | <i>Chrysopa</i>     | sp.                 | 7    |
| Insecta      | Neuroptera  | sp.            |                     |                     | 1    |
| Insecta      | Odonata     | Anisoptera     | sp.                 |                     | 1    |
| Insecta      | Odonata     | sp.            |                     |                     | 3    |
| Insecta      | Orthoptera  | Acrididae      | <i>Calliptamus</i>  | <i>italicus</i>     | 1    |
| Insecta      | Orthoptera  | Acrididae      | <i>Locusta</i>      | <i>migratoria</i>   | 9    |
| Insecta      | Orthoptera  | Acrididae      | <i>Locusta</i>      | sp.                 | 3    |
| Insecta      | Orthoptera  | Acrididae      | <i>Locusta</i>      | <i>verrucivora</i>  |      |
| Insecta      | Orthoptera  | Acrididae      | sp.                 |                     | 23   |
| Insecta      | Orthoptera  | Gryllidae      | <i>Gryllus</i>      | <i>bimaculatus</i>  | 321  |
| Insecta      | Orthoptera  | Gryllidae      | <i>Gryllus</i>      | <i>campestris</i>   | 417  |
| Insecta      | Orthoptera  | Gryllidae      | <i>Gryllus</i>      | sp.                 | 91   |
| Insecta      | Orthoptera  | Gryllidae      | sp.                 |                     | 115  |
| Insecta      | Orthoptera  | Gryllotalpidae | <i>Gryllotalpa</i>  | <i>gryllotalpa</i>  | 361  |
| Insecta      | Orthoptera  | Gryllotalpidae | <i>Gryllotalpa</i>  | sp.                 | 606  |
| Insecta      | Orthoptera  | Gryllotalpidae | sp.                 |                     | 31   |
| Insecta      | Orthoptera  | Tettigoniidae  | <i>Conocephalus</i> | <i>dorsalis</i>     | 1    |
| Insecta      | Orthoptera  | Tettigoniidae  | <i>Decticus</i>     | <i>albifrons</i>    | 44   |
| Insecta      | Orthoptera  | Tettigoniidae  | <i>Decticus</i>     | sp.                 | 14   |
| Insecta      | Orthoptera  | Tettigoniidae  | <i>Ephippiger</i>   | <i>perforatus</i>   | 5    |
| Insecta      | Orthoptera  | Tettigoniidae  | <i>Ephippiger</i>   | sp.                 | 5    |
| Insecta      | Orthoptera  | Tettigoniidae  | <i>Ephippiger</i>   | <i>vitium</i>       | 2    |
| Insecta      | Orthoptera  | Tettigoniidae  | <i>Homocoryphus</i> | <i>nitidulus</i>    | 1    |
| Insecta      | Orthoptera  | Tettigoniidae  | <i>Meconema</i>     | <i>thalassinum</i>  | 1    |
| Insecta      | Orthoptera  | Tettigoniidae  | <i>Placycleis</i>   | <i>affinis</i>      | 2    |
| Insecta      | Orthoptera  | Tettigoniidae  | <i>Placycleis</i>   | <i>albopunctata</i> | 10   |
| Insecta      | Orthoptera  | Tettigoniidae  | <i>Placycleis</i>   | sp.                 | 26   |
| Insecta      | Orthoptera  | Tettigoniidae  | <i>Rhacocleis</i>   | <i>neglecta</i>     | 1    |
| Insecta      | Orthoptera  | Tettigoniidae  | <i>Sepiana</i>      | <i>sepium</i>       | 1    |
| Insecta      | Orthoptera  | Tettigoniidae  | <i>Tessellana</i>   | <i>tessellata</i>   | 3    |
| Insecta      | Orthoptera  | Tettigoniidae  | <i>Tettigonia</i>   | sp.                 | 1    |
| Insecta      | Orthoptera  | Tettigoniidae  | <i>Tettigonia</i>   | <i>viridissima</i>  | 21   |
| Insecta      | Orthoptera  | Tettigoniidae  | sp.                 |                     | 120  |
| Insecta      | Orthoptera  | sp.            |                     |                     | 1487 |
| Malacostraca | Decapoda    | sp.            |                     |                     | 1    |
| Malacostraca | Isopoda     | sp.            |                     |                     | 1    |
