# Supplementary material
Source: publisher figshare collection journal article supplement (https://tandf.figshare.com/articles/dataset/_/3084343)
Supplement: Supplementary file 2 [file 1]

111 **Table S1. Number of invertebrates and prey analysed in barn owl pellets collected in different countries.**

| Country          | Nb studies | Mean year | Range     | Nb invertebrates | Nb prey analysed | % invertebrates |
|------------------|------------|-----------|-----------|------------------|------------------|-----------------|
| Albania          | 1          | 2001      |           | 1                | 68               | 1.47            |
| Austria          | 8          | 1971      | 1951-2004 | 45               | 11298            | 0.4             |
| Balearic Islands | 2          | 2004      | 2001-2007 | 102              | 2998             | 3.4             |
| Belgium          | 10         | 1968      | 1941-1990 | 166              | 155883           | 0.11            |
| Bosnia           | 1          | 1989      |           | 0                | 1782             | 0               |
| Bulgaria         | 6          | 1995      | 1971-2012 | 91               | 60597            | 0.15            |
| Corsica          | 3          | 1973      | 1966-1980 | 458              | 11295            | 4.05            |
| Cos              | 1          | 1978      |           | 28               | 2277             | 1.23            |
| Crete            | 3          | 1974      | 1942-2007 | 76               | 1359             | 5.59            |
| Croatia          | 3          | 1996      | 1971-2009 | 9                | 8633             | 0.1             |
| Czech Republic   | 22         | 1974      | 1941-2003 | 106              | 103037           | 0.1             |
| Denmark          | 1          | 1937      |           | 0                | 36173            | 0               |
| France           | 91         | 1974      | 1926-2012 | 2442             | 687741           | 0.36            |
| Germany          | 149        | 1966      | 1860-2011 | 487              | 558572           | 0.09            |
| Greece           | 10         | 1993      | 1972-2003 | 121              | 9549             | 1.27            |
| Hungary          | 37         | 1981      | 1905-2009 | 139              | 101699           | 0.14            |
| Ireland          | 19         | 1984      | 1964-2008 | 15               | 28442            | 0.05            |
| Italy            | 58         | 1987      | 1943-2008 | 690              | 81267            | 0.85            |
| Luxemburg        | 9          | 1942      | 1931-1948 | 21               | 11003            | 0.19            |
| Malta            | 2          | 1984      | 1981-1986 | 2                | 424              | 0.47            |
| Netherlands      | 11         | 1972      | 1951-1996 | 11               | 127676           | 0.01            |
| Poland           | 16         | 1988      | 1960-2009 | 441              | 91477            | 0.48            |
| Portugal         | 9          | 1999      | 1967-2009 | 361              | 27297            | 1.32            |
| Romania          | 6          | 1997      | 1964-2008 | 79               | 31518            | 0.25            |
| Sardinia         | 6          | 1984      | 1976-1999 | 110              | 2619             | 4.2             |
| Serbia           | 5          | 1995      | 1970-2010 | 68               | 11851            | 0.57            |
| Sicily           | 3          | 1995      | 1983-2010 | 16               | 1240             | 1.29            |
| Slovakia         | 8          | 1982      | 1955-2004 | 67               | 23431            | 0.29            |
| Slovenia         | 5          | 1990      | 1977-1998 | 20               | 5483             | 0.36            |
| Spain            | 40         | 1982      | 1953-2007 | 3422             | 148872           | 2.3             |
| Sweden           | 1          | 1965      |           | 0                | 1661             | 0               |

|             |     |      |           |      |         |      |
|-------------|-----|------|-----------|------|---------|------|
| Switzerland | 17  | 1976 | 1926-2012 | 16   | 291100  | 0.01 |
| UK          | 53  | 1969 | 1910-2010 | 68   | 490048  | 0.01 |
| Total       | 616 | 1976 | 1860-2012 | 9678 | 3128370 | 0.92 |

---
